# Supplementary material for: Negative correlation between rates of molecular evolution and flowering cycles in temperate woody bamboos revealed by plastid phylogenomics
Source: PubMed Central journal article supplement (PMC5740905; doi:10.1186/s12870-017-1199-8), 2017-12-21

A

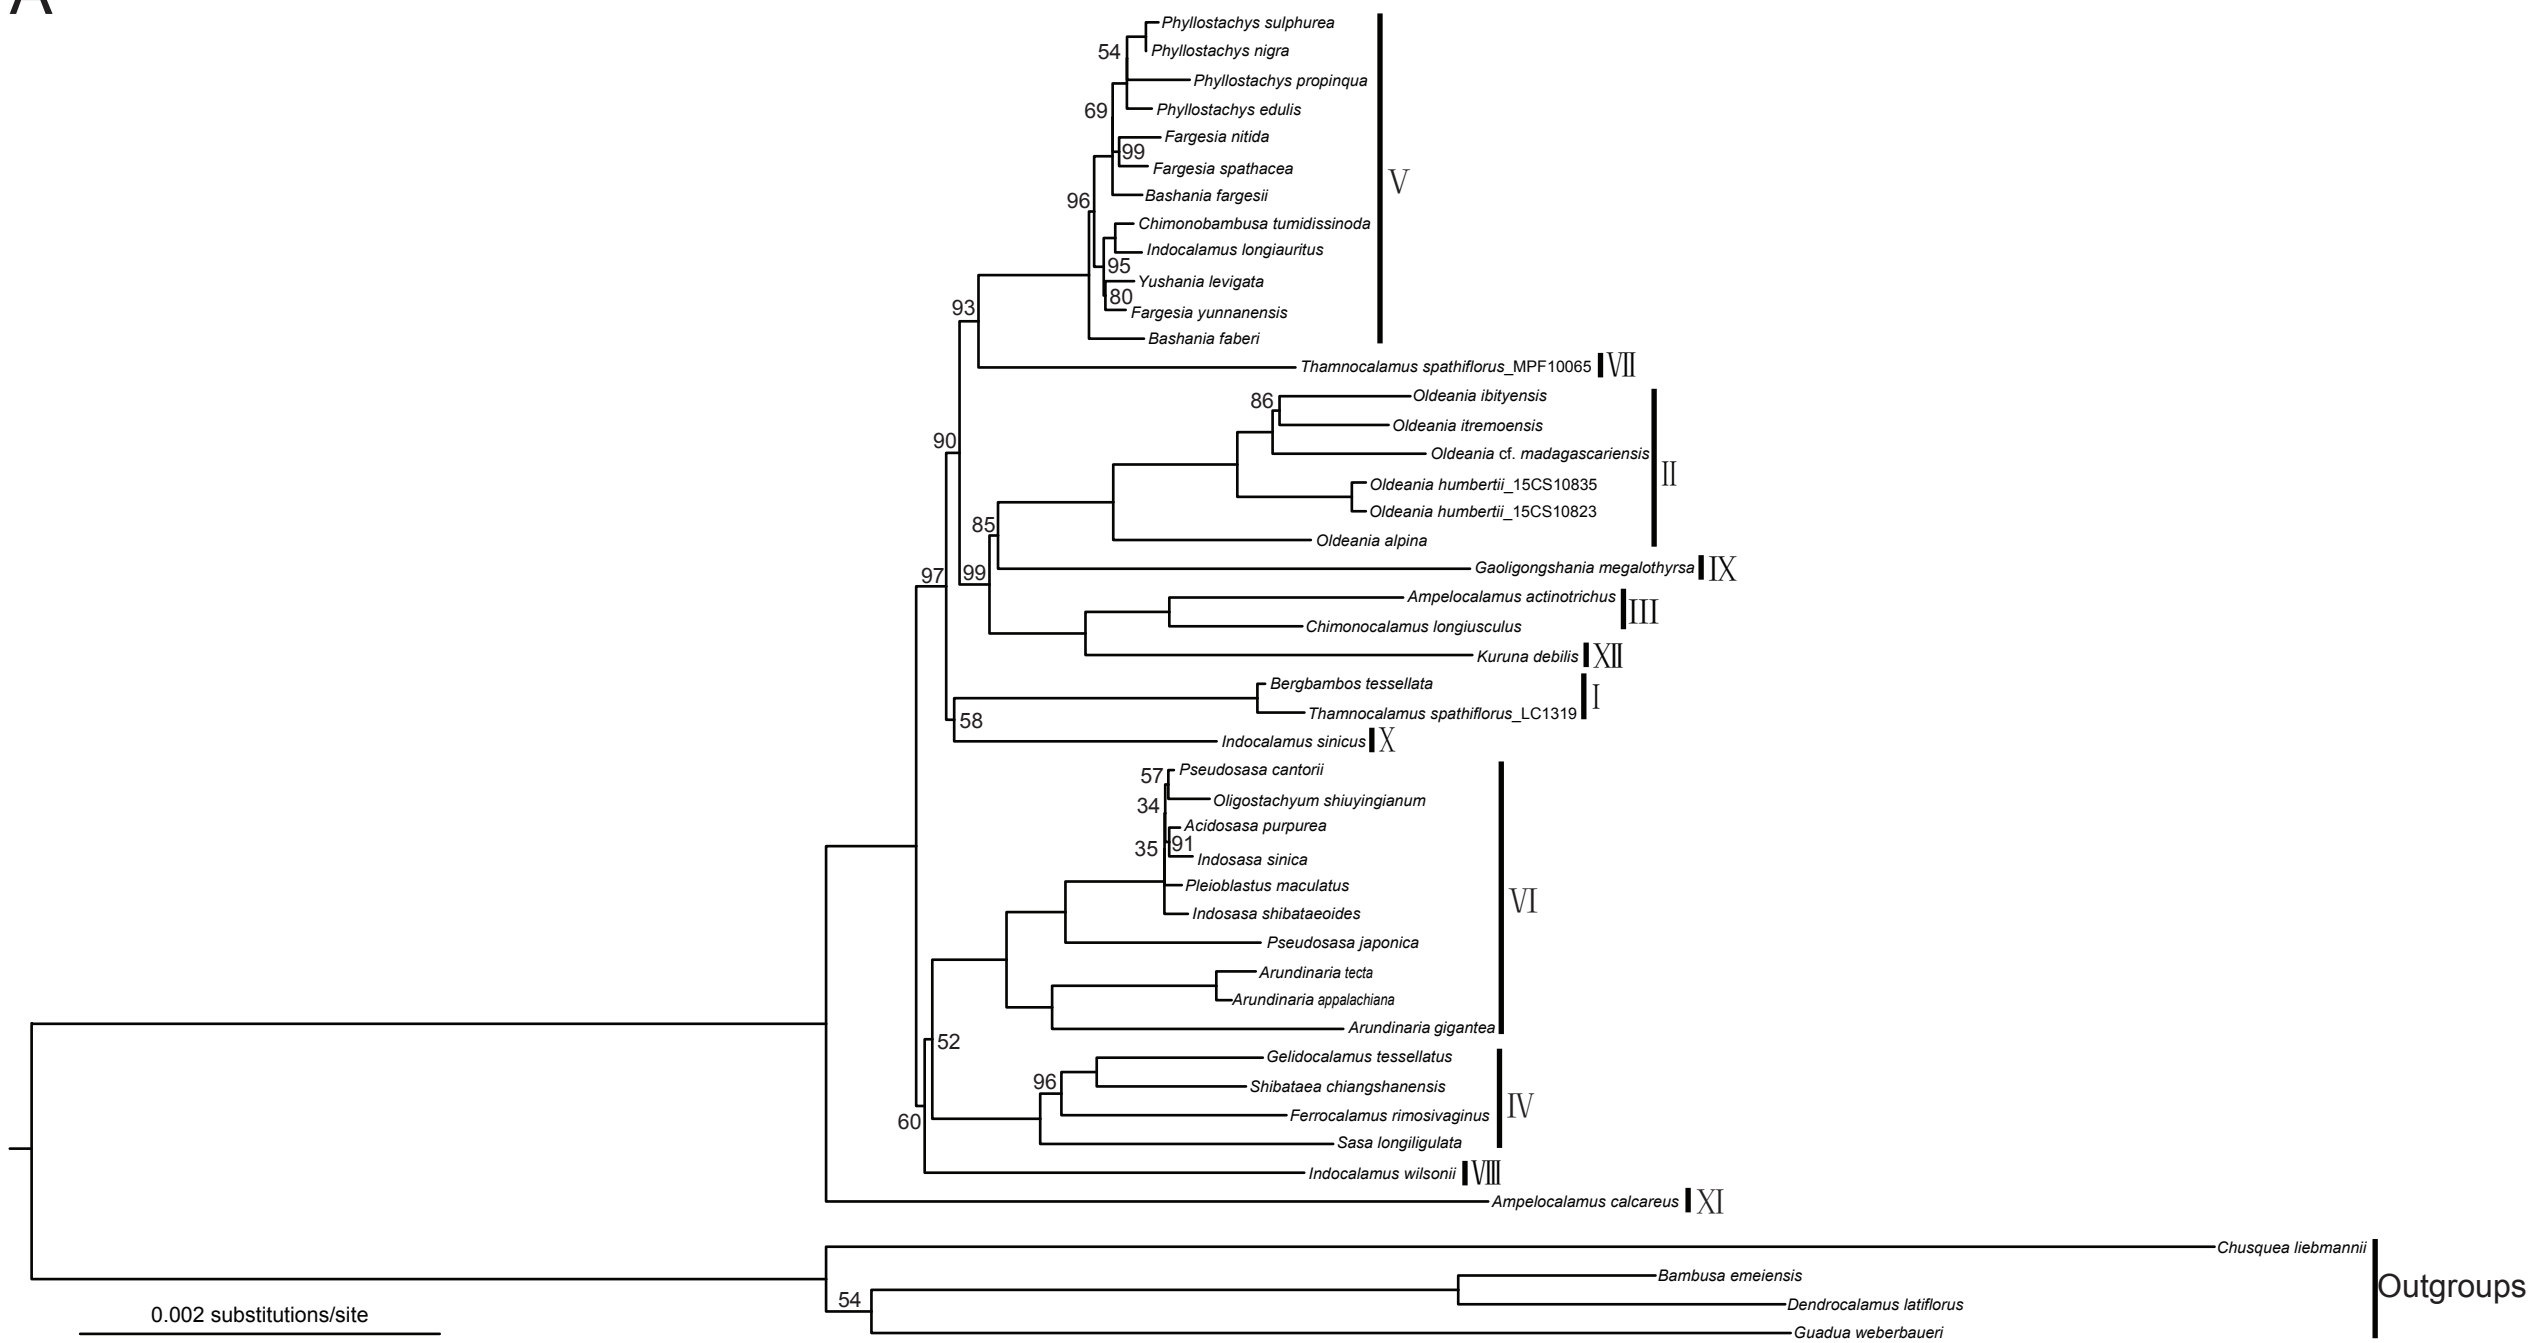

B

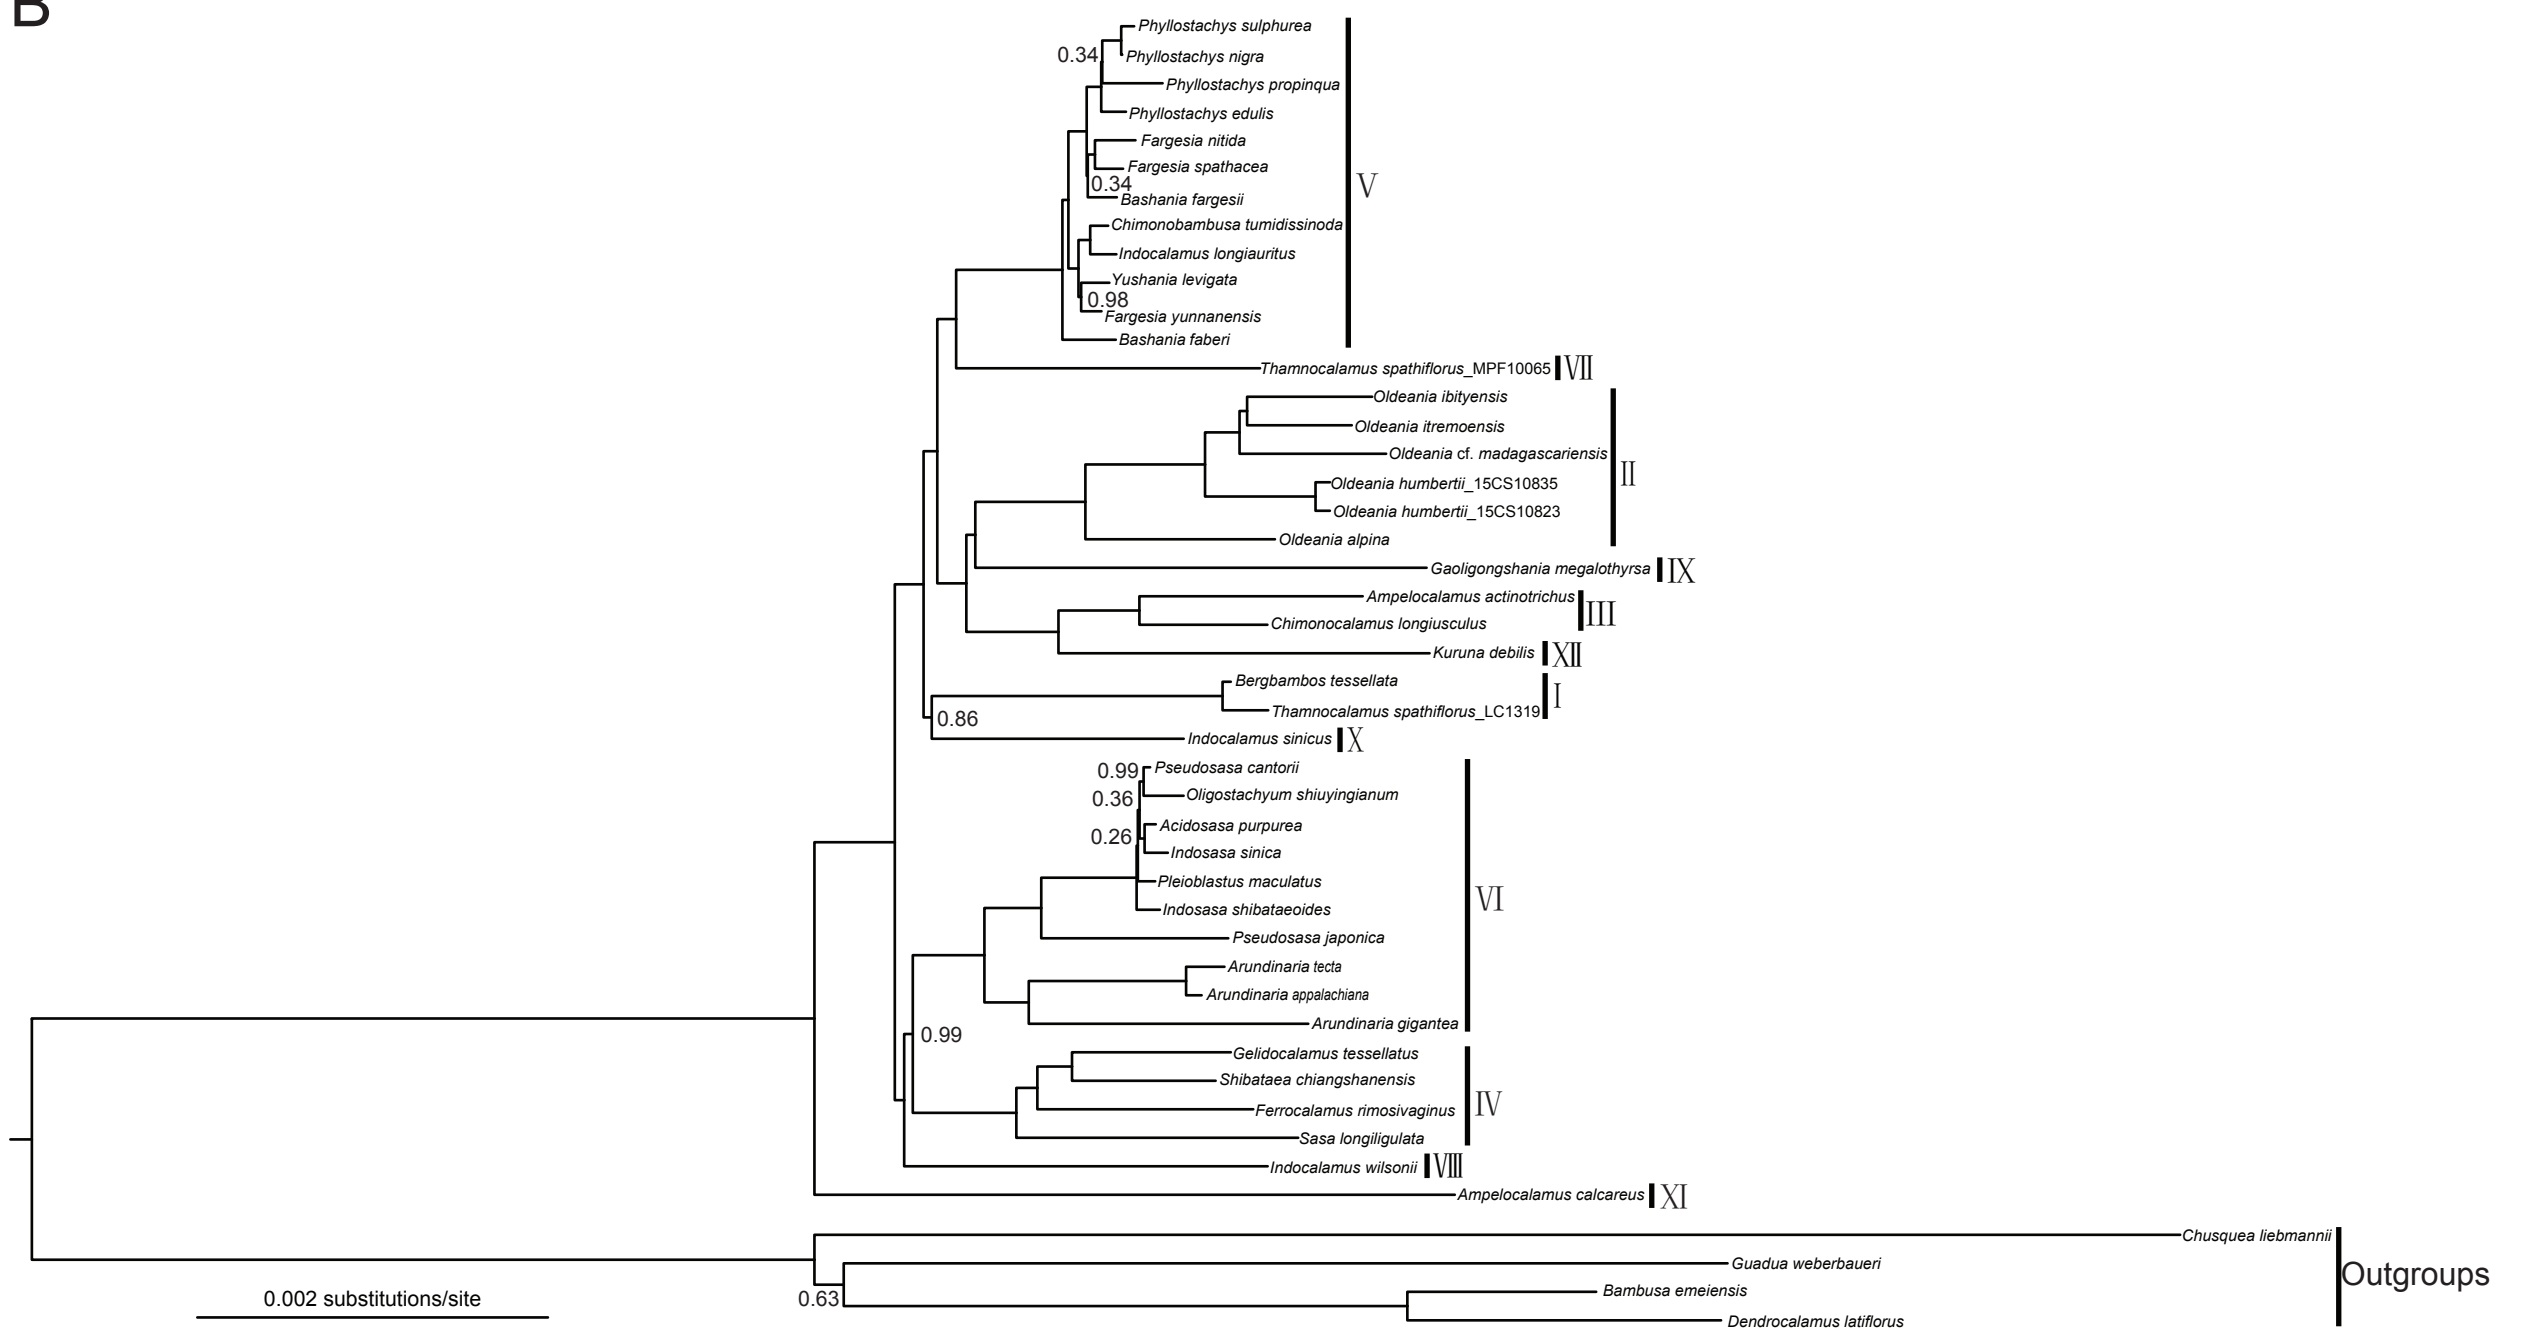

Supplement: 12870_2017_1199_MOESM2_ESM.pdf [file 12870_2017_1199_MOESM2_ESM.pdf]
