# Supplementary material for: Image representations for access and similarity-based organization of web information
Source: Springer Nature journal article supplement (doi:10.1186/s12870-017-1199-8), 1999-01-01

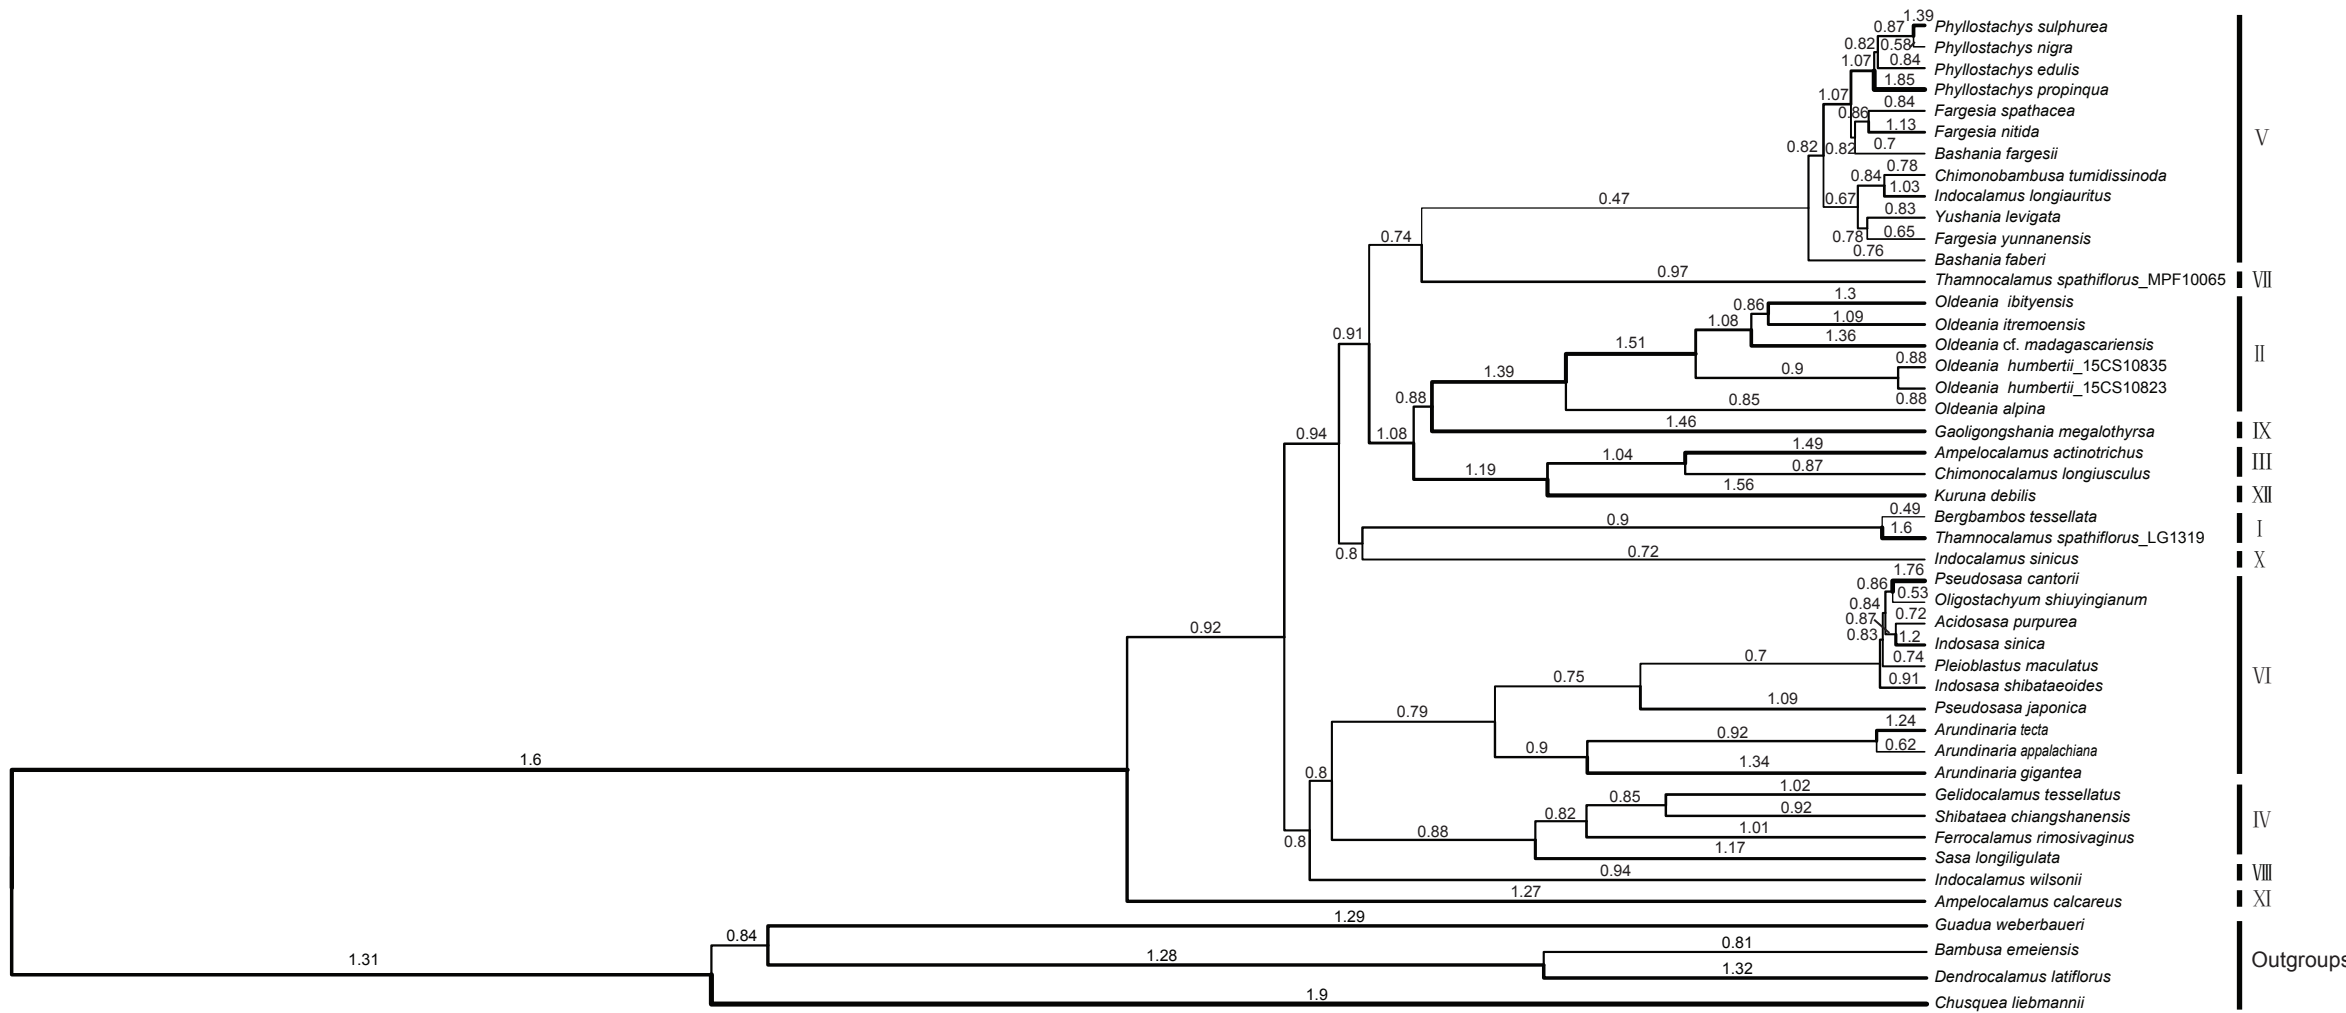

Supplement: 12870_2017_1199_MOESM10_ESM.pdf [file 12870_2017_1199_MOESM10_ESM.pdf]
